# Supplementary material
Source: PubMed Central journal article supplement (PMC2876802)

A.

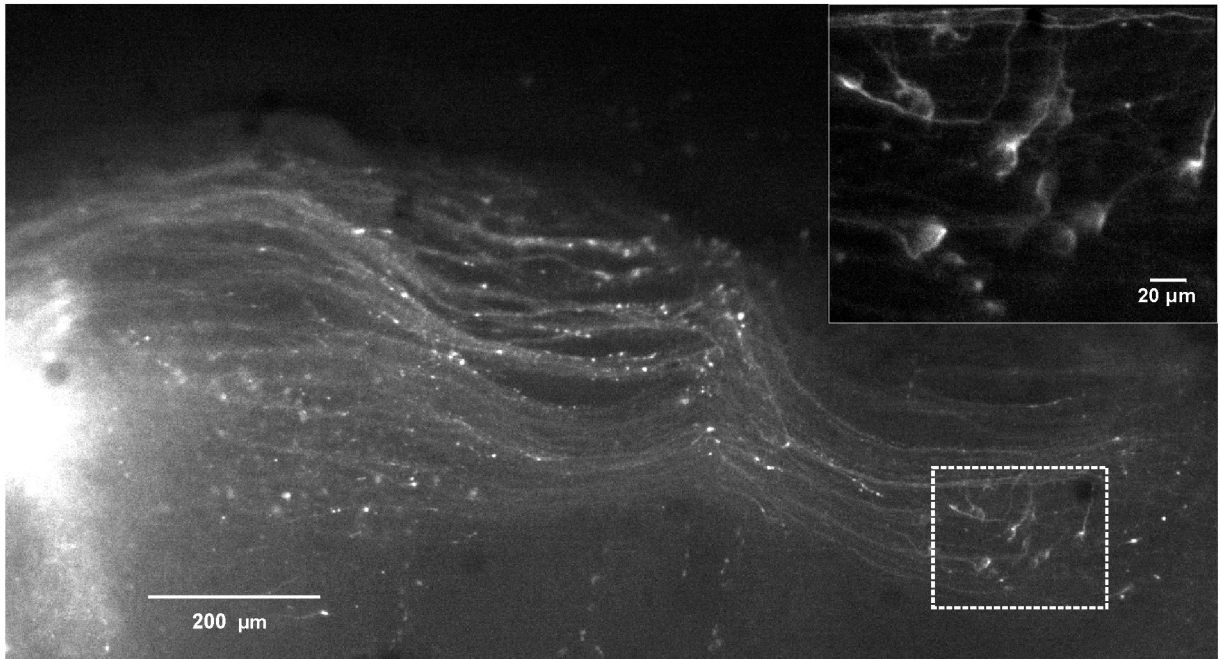

B.

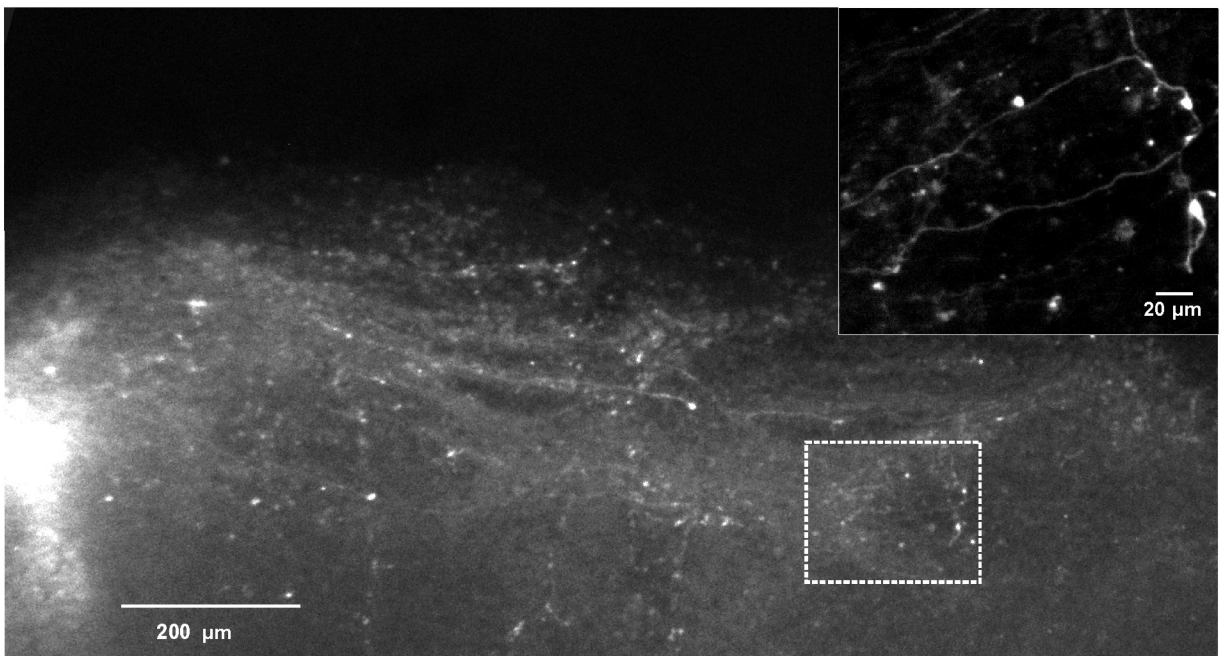

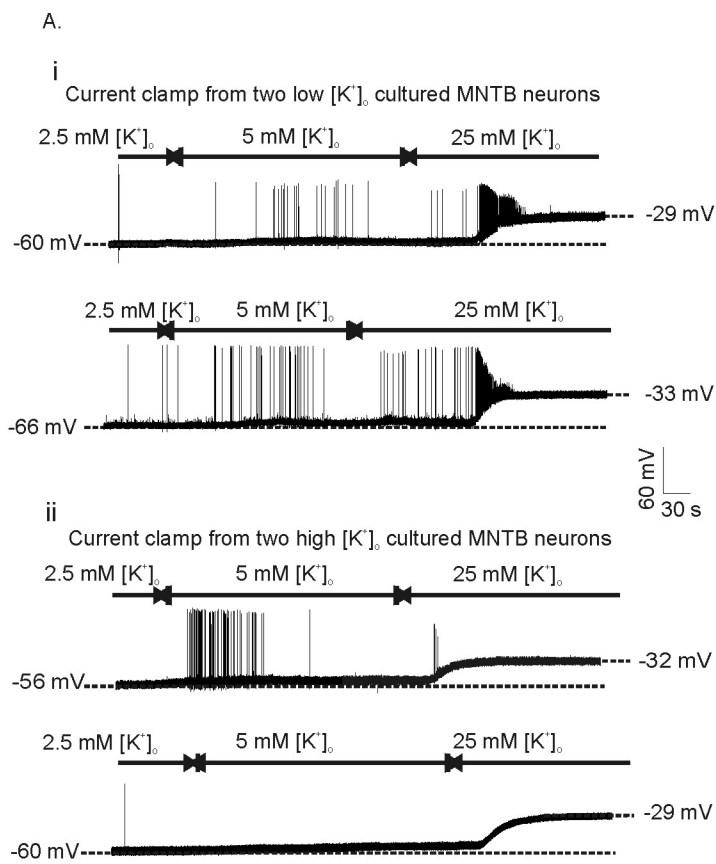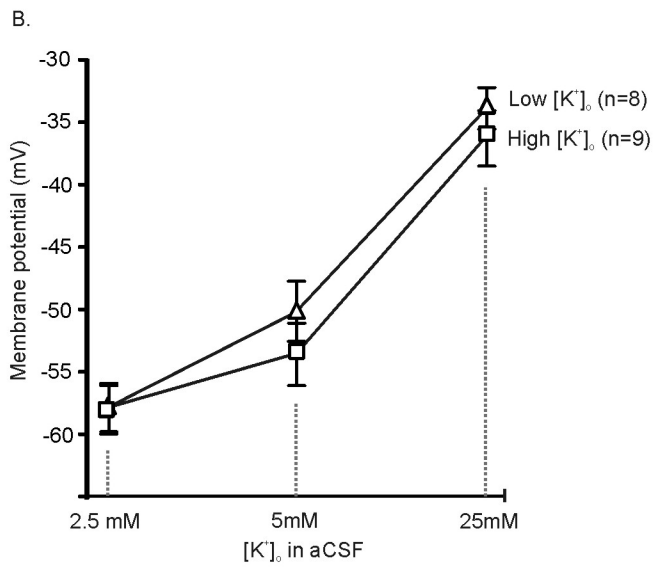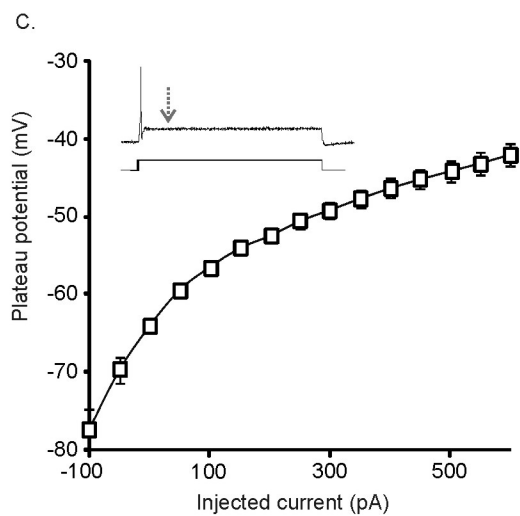

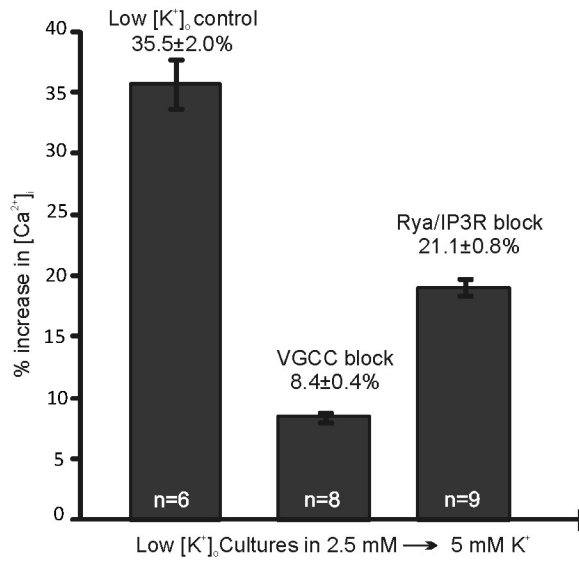

Supplementary Fig S3.

Supplement: tjp0588-1451-SD1.pdf [file tjp0588-1451-SD1.pdf]
